# Supplementary material for: A Factorial Trial of Six Interventions for the Prevention of Postoperative Nausea and Vomiting
Source: Atypon-hosted journal article supplement (doi:10.1056/nejmoa032196), 2004-06-09
Supplement: 2441sa1.pdf [file 2441sa1.pdf]

# Supplementary Appendix 1

This appendix has been provided by the authors to give readers additional information about their work.

Supplement to: Apfel CC, Korttila K, Abdalla M, et al. A Factorial Trial of Six Interventions for the Prevention of Postoperative Nausea and Vomiting. *N Engl J Med* 2004;350:2441-51.

**Table S1: Baseline characteristics of 4086 patients randomized for all six interventions**

|                                               | <b>Ondansetron/<br/>none</b> | <b>Dexametha-<br/>sone/none</b> | <b>Droperidol/<br/>none</b> | <b>Propofol/<br/>Inhalation</b> | <b>Nitrogen/<br/>Nitrous oxide</b> | <b>Remifentanil/<br/>Fentanyl</b> |
|-----------------------------------------------|------------------------------|---------------------------------|-----------------------------|---------------------------------|------------------------------------|-----------------------------------|
| <b>Patients (N)</b>                           | 2037/2049                    | 2046/2040                       | 2036/2050                   | 2706/1380                       | 2050/2036                          | 2038/2048                         |
| <b>Age (years)</b>                            | 47.1/46.6                    | 47/46.7                         | 46.7/47                     | 46.9/46.7                       | 46.7/47.1                          | 47.1/46.7                         |
| <b>Females (%)</b>                            | 80.8/79.7                    | 80.6/79.9                       | 80.4/80.1                   | 80.5/79.8                       | 80.8/79.8                          | 80.4/80.2                         |
| <b>Non-smoker (%)</b>                         | 79.7/81.3                    | 79.8/81.2                       | 81.1/79.9                   | 80.5/80.5                       | 79.6/81.4                          | 80.2/80.9                         |
| <b>History of PONV or MS (%)</b>              | 53.6/52.5                    | 53.9/52.3                       | 53.2/52.9                   | 53.4/52.4                       | 53.2/52.9                          | 53.8/52.3                         |
| <b>Postoperative opioids (%)</b>              | 80.4/79.6                    | 79.8/80.2                       | 77.8/82.2*                  | 79.4/81.1                       | 80.0/80.0                          | 88.4/71.5*                        |
| <b>PONV risk (%)*</b>                         | 58.7/58.5                    | 58.6/58.6                       | 58.4/58.9                   | 58.7/58.6                       | 58.6/58.6                          | 60.4/56.9*                        |
| <b>Surgery</b>                                |                              |                                 |                             |                                 |                                    |                                   |
| <i>Hernia repair (%)</i>                      | 3/3.6                        | 3.6/2.9                         | 3.7/2.8                     | 3/3.7                           | 3.4/3.1                            | 3.2/3.3                           |
| <i>Cholecystectomy (%)</i>                    | 7.1/7.3                      | 7.3/7.1                         | 6.9/7.5                     | 7.2/7.1                         | 7.4/7                              | 7.4/7                             |
| <i>Hysterectomy (%)</i>                       | 18/16.5                      | 17.4/17.2                       | 17.5/17.1                   | 17.6/16.7                       | 16.3/18.3                          | 17.6/17                           |
| <i>Thyroid surgery (%)</i>                    | 6.5/7.2                      | 6.7/7                           | 6.6/7.1                     | 6.8/6.8                         | 7/6.7                              | 7.5/6.2                           |
| <i>Breast surgery (%)</i>                     | 3/2.9                        | 3.1/2.8                         | 2.9/3                       | 3.1/2.7                         | 3/2.9                              | 2.7/3.2                           |
| <i>Hip replacement (%)</i>                    | 3.9/4                        | 3.8/4.1                         | 4.1/3.8                     | 4.1/4.6                         | 3.8/4                              | 4.3/3.6                           |
| <i>Knee arthroscopy (%)</i>                   | 1.9/1.9                      | 1.8/2                           | 2/1.8                       | 1.8/2.1                         | 1.5/2.3                            | 1.8/2                             |
| <i>Upper extremity surgery (%)</i>            | 2.7/2                        | 2.6/2.1                         | 2.5/2.2                     | 2/2.9                           | 2.8/1.9                            | 2.2/2.5                           |
| <i>Ears, nose, throat and eye surgery (%)</i> | 9.8/11.1                     | 10.7/10.3                       | 10.3/10.7                   | 10.4/10.6                       | 9.5/11.4                           | 9.8/11.2                          |
| <i>Other gynecologic surgery (%)</i>          | 24.9/26.1                    | 25.4/25.6                       | 25.7/25.3                   | 25.4/25.6                       | 26.1/24.9                          | 25.5/25.6                         |
| <i>Other bone surgery (%)</i>                 | 6.2/7                        | 6.7/6.5                         | 5.9/7.3                     | 6.5/6.8                         | 7.3/5.9                            | 7/6.2                             |
| <i>Other general surgery (%)</i>              | 13/10.4                      | 11/12.4                         | 12/11.4                     | 11.9/11.3                       | 11.8/11.5                          | 11.1/12.2                         |
| <b>Nasogastric tube (%)</b>                   | 32.7/32                      | 32.2/32.5                       | 32.5/32.2                   | 32.4/32.3                       | 34.1/30.6*                         | 31.9/32.8                         |
| <b>Duration of anesthesia (hours)</b>         | 1.82/1.79                    | 1.81/1.8                        | 1.82/1.79                   | 1.79/1.83                       | 1.82/1.79                          | 1.79/1.82                         |
| <b>Muscle relaxant reversal drugs</b>         |                              |                                 |                             |                                 |                                    |                                   |
| <i>None (%)</i>                               | 74.8/75.6                    | 75.5/75.0                       | 75.1/75.4                   | 75.9/73.8                       | 75.2/75.2                          | 77.5/73.0*                        |
| <i>Neostigmine (%)</i>                        | 24.3/23.1                    | 23.7/23.6                       | 23.9/23.4                   | 23.1/24.7                       | 23.5/23.8                          | 21.8/25.6*                        |
| <i>Pyridostigmine (%)</i>                     | 0.9/1.3                      | 0.8/1.4                         | 1.0/1.2                     | 0.9/1.5                         | 1.3/0.9                            | 0.8/1.4*                          |

\*Indicates P≤0.05.

**Table S2: Risk factors and outcome variables for the 4086 patients according to all randomized interventions of the factorial design.**

| Randomized Interventions<br>[0 = no or comparator, 1 = yes] |               |            |          |          |              | Number of Patients | Frequency of Risk Factors [percent] |         |            |         | Duration of Anesthesia [hours] | Risk according to Simplified Score [percent] | Maximum Nausea [average ratings] |      |         | Incidence of Nausea [percent of patients] |      |         | Average Number of Emesis |      |         | Incidence of Vomiting [percent of patients] |      |         | Incidence of PONV [percent of patients] |      |         |
|-------------------------------------------------------------|---------------|------------|----------|----------|--------------|--------------------|-------------------------------------|---------|------------|---------|--------------------------------|----------------------------------------------|----------------------------------|------|---------|-------------------------------------------|------|---------|--------------------------|------|---------|---------------------------------------------|------|---------|-----------------------------------------|------|---------|
| Ondansetron                                                 | Dexamethasone | Droperidol | Propofol | Nitrogen | Remifentanil |                    | Females                             | History | Nonsmoking | Opioids |                                |                                              | Early                            | Late | Overall | Early                                     | Late | Overall | Early                    | Late | Overall | Early                                       | Late | Overall | Early                                   | Late | Overall |
| 0                                                           | 0             | 0          | 0        | 0        | 0            | 44                 | 82                                  | 64      | 84         | 74      | 1.76                           | 61                                           | 1.81                             | 1.91 | 2.77    | 36                                        | 44   | 59      | 0.18                     | 0.16 | 0.34    | 11                                          | 11   | 18      | 36                                      | 47   | 59      |
| 0                                                           | 0             | 0          | 0        | 0        | 1            | 44                 | 86                                  | 43      | 89         | 84      | 1.75                           | 60                                           | 1.00                             | 2.14 | 2.66    | 27                                        | 39   | 52      | 0.11                     | 0.27 | 0.39    | 9                                           | 23   | 32      | 27                                      | 41   | 55      |
| 0                                                           | 0             | 0          | 0        | 1        | 0            | 46                 | 85                                  | 50      | 78         | 76      | 1.70                           | 58                                           | 1.28                             | 1.77 | 2.51    | 28                                        | 39   | 52      | 0.11                     | 0.22 | 0.33    | 9                                           | 13   | 20      | 30                                      | 39   | 52      |
| 0                                                           | 0             | 0          | 0        | 1        | 1            | 40                 | 73                                  | 50      | 75         | 80      | 1.80                           | 56                                           | 1.98                             | 2.28 | 3.20    | 40                                        | 48   | 65      | 0.13                     | 0.23 | 0.35    | 10                                          | 15   | 23      | 40                                      | 48   | 65      |
| 0                                                           | 0             | 0          | 1        | 0        | 0            | 88                 | 78                                  | 57      | 83         | 74      | 1.77                           | 58                                           | 1.67                             | 2.53 | 2.86    | 31                                        | 46   | 51      | 0.11                     | 0.34 | 0.45    | 11                                          | 24   | 32      | 31                                      | 51   | 56      |
| 0                                                           | 0             | 0          | 1        | 0        | 1            | 85                 | 72                                  | 49      | 78         | 89      | 1.72                           | 57                                           | 1.38                             | 2.10 | 2.75    | 27                                        | 40   | 52      | 0.08                     | 0.36 | 0.45    | 8                                           | 22   | 28      | 29                                      | 46   | 56      |
| 0                                                           | 0             | 0          | 1        | 1        | 0            | 88                 | 84                                  | 49      | 75         | 72      | 1.87                           | 56                                           | 1.22                             | 2.41 | 2.76    | 20                                        | 38   | 43      | 0.08                     | 0.20 | 0.28    | 6                                           | 20   | 25      | 20                                      | 39   | 44      |
| 0                                                           | 0             | 0          | 1        | 1        | 1            | 84                 | 81                                  | 45      | 86         | 89      | 1.66                           | 60                                           | 1.08                             | 1.73 | 2.08    | 20                                        | 38   | 42      | 0.05                     | 0.18 | 0.23    | 4                                           | 15   | 18      | 20                                      | 39   | 43      |
| 0                                                           | 0             | 1          | 0        | 0        | 0            | 43                 | 72                                  | 51      | 91         | 81      | 2.00                           | 59                                           | 1.27                             | 1.98 | 2.97    | 23                                        | 30   | 44      | 0.09                     | 0.23 | 0.33    | 7                                           | 19   | 26      | 23                                      | 33   | 47      |
| 0                                                           | 0             | 1          | 0        | 0        | 1            | 42                 | 83                                  | 60      | 88         | 90      | 1.71                           | 64                                           | 1.33                             | 2.33 | 2.98    | 17                                        | 40   | 43      | 0.14                     | 0.26 | 0.40    | 10                                          | 21   | 26      | 17                                      | 40   | 43      |
| 0                                                           | 0             | 1          | 0        | 1        | 0            | 40                 | 78                                  | 55      | 85         | 68      | 2.33                           | 57                                           | 0.70                             | 1.44 | 1.58    | 20                                        | 28   | 30      | 0.03                     | 0.08 | 0.10    | 3                                           | 8    | 10      | 20                                      | 28   | 30      |
| 0                                                           | 0             | 1          | 0        | 1        | 1            | 41                 | 83                                  | 46      | 80         | 80      | 1.65                           | 58                                           | 1.24                             | 1.34 | 1.71    | 17                                        | 24   | 29      | 0.07                     | 0.07 | 0.15    | 7                                           | 7    | 12      | 17                                      | 27   | 32      |
| 0                                                           | 0             | 1          | 1        | 0        | 0            | 79                 | 78                                  | 49      | 82         | 74      | 1.59                           | 57                                           | 0.49                             | 1.23 | 1.42    | 13                                        | 27   | 28      | 0.01                     | 0.22 | 0.23    | 1                                           | 13   | 14      | 13                                      | 27   | 28      |
| 0                                                           | 0             | 1          | 1        | 0        | 1            | 87                 | 78                                  | 52      | 86         | 83      | 1.67                           | 60                                           | 0.53                             | 1.91 | 2.19    | 13                                        | 37   | 41      | 0.02                     | 0.20 | 0.22    | 1                                           | 14   | 15      | 13                                      | 37   | 41      |
| 0                                                           | 0             | 1          | 1        | 1        | 0            | 86                 | 84                                  | 51      | 86         | 62      | 1.85                           | 57                                           | 0.67                             | 1.36 | 1.70    | 19                                        | 29   | 38      | 0.03                     | 0.13 | 0.16    | 3                                           | 8    | 9       | 19                                      | 29   | 38      |
| 0                                                           | 0             | 1          | 1        | 1        | 1            | 83                 | 80                                  | 54      | 81         | 89      | 1.82                           | 61                                           | 0.33                             | 1.35 | 1.52    | 7                                         | 28   | 31      | 0.01                     | 0.17 | 0.18    | 1                                           | 11   | 12      | 7                                       | 29   | 33      |
| 0                                                           | 1             | 0          | 0        | 0        | 0            | 42                 | 67                                  | 50      | 83         | 71      | 1.93                           | 54                                           | 1.26                             | 2.17 | 2.43    | 19                                        | 40   | 45      | 0.14                     | 0.17 | 0.31    | 12                                          | 12   | 24      | 21                                      | 43   | 50      |
| 0                                                           | 1             | 0          | 0        | 0        | 1            | 43                 | 88                                  | 44      | 84         | 93      | 1.95                           | 61                                           | 1.79                             | 2.05 | 2.65    | 28                                        | 35   | 42      | 0.16                     | 0.16 | 0.33    | 16                                          | 14   | 28      | 30                                      | 37   | 44      |
| 0                                                           | 1             | 0          | 0        | 1        | 0            | 43                 | 81                                  | 60      | 79         | 81      | 2.19                           | 61                                           | 0.91                             | 1.33 | 1.91    | 21                                        | 28   | 40      | 0.05                     | 0.12 | 0.16    | 5                                           | 9    | 14      | 21                                      | 28   | 40      |
| 0                                                           | 1             | 0          | 0        | 1        | 1            | 44                 | 84                                  | 52      | 77         | 93      | 1.82                           | 62                                           | 1.02                             | 1.25 | 1.82    | 16                                        | 27   | 34      | 0.09                     | 0.05 | 0.14    | 7                                           | 5    | 11      | 16                                      | 27   | 34      |
| 0                                                           | 1             | 0          | 1        | 0        | 0            | 84                 | 82                                  | 51      | 79         | 70      | 1.63                           | 56                                           | 0.65                             | 1.44 | 1.78    | 17                                        | 29   | 36      | 0.04                     | 0.18 | 0.21    | 4                                           | 12   | 14      | 18                                      | 30   | 37      |
| 0                                                           | 1             | 0          | 1        | 0        | 1            | 89                 | 79                                  | 60      | 82         | 88      | 1.73                           | 61                                           | 1.29                             | 1.22 | 1.89    | 25                                        | 22   | 35      | 0.13                     | 0.16 | 0.29    | 11                                          | 9    | 17      | 26                                      | 22   | 35      |
| 0                                                           | 1             | 0          | 1        | 1        | 0            | 82                 | 73                                  | 51      | 77         | 70      | 1.84                           | 54                                           | 0.49                             | 1.58 | 1.77    | 13                                        | 27   | 30      | 0.00                     | 0.22 | 0.22    | 0                                           | 13   | 13      | 13                                      | 27   | 30      |
| 0                                                           | 1             | 0          | 1        | 1        | 1            | 85                 | 84                                  | 52      | 79         | 93      | 1.79                           | 61                                           | 0.92                             | 1.54 | 2.04    | 20                                        | 26   | 34      | 0.06                     | 0.19 | 0.25    | 5                                           | 14   | 15      | 20                                      | 27   | 35      |
| 0                                                           | 1             | 1          | 0        | 0        | 0            | 42                 | 79                                  | 60      | 88         | 75      | 1.87                           | 60                                           | 0.69                             | 1.45 | 1.98    | 19                                        | 31   | 40      | 0.10                     | 0.19 | 0.29    | 10                                          | 14   | 21      | 21                                      | 31   | 40      |
| 0                                                           | 1             | 1          | 0        | 0        | 1            | 44                 | 82                                  | 52      | 91         | 80      | 1.64                           | 60                                           | 1.56                             | 1.30 | 1.99    | 30                                        | 27   | 36      | 0.16                     | 0.07 | 0.23    | 11                                          | 7    | 14      | 32                                      | 27   | 39      |
| 0                                                           | 1             | 1          | 0        | 1        | 0            | 46                 | 76                                  | 39      | 74         | 70      | 1.87                           | 52                                           | 0.25                             | 1.16 | 1.27    | 7                                         | 24   | 24      | 0.00                     | 0.07 | 0.07    | 0                                           | 7    | 7       | 7                                       | 24   | 24      |
| 0                                                           | 1             | 1          | 0        | 1        | 1            | 44                 | 80                                  | 66      | 73         | 90      | 1.66                           | 61                                           | 0.25                             | 0.61 | 0.68    | 9                                         | 18   | 23      | 0.00                     | 0.02 | 0.02    | 0                                           | 2    | 2       | 9                                       | 18   | 23      |
| 0                                                           | 1             | 1          | 1        | 0        | 0            | 86                 | 83                                  | 59      | 84         | 67      | 1.74                           | 58                                           | 0.47                             | 1.44 | 1.62    | 13                                        | 27   | 30      | 0.02                     | 0.17 | 0.20    | 2                                           | 10   | 12      | 14                                      | 27   | 31      |
| 0                                                           | 1             | 1          | 1        | 0        | 1            | 86                 | 79                                  | 58      | 81         | 93      | 1.78                           | 62                                           | 0.51                             | 0.91 | 1.14    | 13                                        | 21   | 24      | 0.05                     | 0.10 | 0.15    | 5                                           | 8    | 13      | 14                                      | 22   | 26      |
| 0                                                           | 1             | 1          | 1        | 1        | 0            | 87                 | 77                                  | 48      | 78         | 68      | 1.83                           | 54                                           | 0.61                             | 0.82 | 0.97    | 13                                        | 16   | 21      | 0.01                     | 0.07 | 0.08    | 1                                           | 6    | 7       | 14                                      | 16   | 22      |
| 0                                                           | 1             | 1          | 1        | 1        | 1            | 82                 | 82                                  | 52      | 76         | 84      | 1.82                           | 59                                           | 0.55                             | 0.79 | 1.12    | 16                                        | 20   | 27      | 0.02                     | 0.07 | 0.10    | 2                                           | 5    | 7       | 17                                      | 20   | 28      |
| 1                                                           | 0             | 0          | 0        | 0        | 0            | 43                 | 86                                  | 51      | 81         | 74      | 1.83                           | 58                                           | 1.10                             | 1.74 | 2.10    | 21                                        | 35   | 40      | 0.12                     | 0.09 | 0.21    | 9                                           | 7    | 14      | 23                                      | 37   | 42      |
| 1                                                           | 0             | 0          | 0        | 0        | 1            | 41                 | 80                                  | 63      | 78         | 93      | 2.12                           | 63                                           | 1.99                             | 1.95 | 2.76    | 37                                        | 32   | 46      | 0.24                     | 0.20 | 0.44    | 17                                          | 7    | 20      | 37                                      | 32   | 46      |
| 1                                                           | 0             | 0          | 0        | 1        | 0            | 45                 | 78                                  | 56      | 82         | 84      | 1.95                           | 60                                           | 1.22                             | 1.49 | 2.07    | 24                                        | 36   | 44      | 0.09                     | 0.18 | 0.27    | 7                                           | 11   | 13      | 27                                      | 38   | 44      |
| 1                                                           | 0             | 0          | 0        | 1        | 1            | 45                 | 76                                  | 49      | 82         | 98      | 1.50                           | 61                                           | 0.71                             | 0.96 | 1.27    | 11                                        | 16   | 22      | 0.18                     | 0.18 | 0.36    | 11                                          | 16   | 22      | 16                                      | 22   | 31      |
| 1                                                           | 0             | 0          | 1        | 0        | 0            | 86                 | 81                                  | 59      | 84         | 67      | 1.87                           | 58                                           | 0.78                             | 1.24 | 1.59    | 17                                        | 24   | 30      | 0.05                     | 0.17 | 0.22    | 3                                           | 9    | 12      | 19                                      | 25   | 31      |
| 1                                                           | 0             | 0          | 1        | 0        | 1            | 83                 | 84                                  | 48      | 77         | 92      | 1.83                           | 60                                           | 0.80                             | 1.61 | 2.03    | 17                                        | 28   | 36      | 0.07                     | 0.23 | 0.30    | 6                                           | 16   | 18      | 18                                      | 29   | 36      |
| 1                                                           | 0             | 0          | 1        | 1        | 0            | 80                 | 76                                  | 48      | 80         | 76      | 1.66                           | 56                                           | 0.45                             | 1.67 | 1.78    | 9                                         | 33   | 34      | 0.04                     | 0.14 | 0.18    | 3                                           | 10   | 13      | 9                                       | 33   | 34      |
| 1                                                           | 0             | 0          | 1        | 1        | 1            | 89                 | 81                                  | 57      | 78         | 94      | 1.85                           | 62                                           | 0.64                             | 1.59 | 1.95    | 18                                        | 34   | 38      | 0.01                     | 0.20 | 0.21    | 1                                           | 12   | 13      | 18                                      | 35   | 39      |
| 1                                                           | 0             | 1          | 0        | 0        | 0            | 47                 | 72                                  | 34      | 79         | 72      | 1.59                           | 51                                           | 0.66                             | 0.69 | 1.14    | 13                                        | 15   | 22      | 0.11                     | 0.02 | 0.13    | 9                                           | 2    | 9       | 17                                      | 17   | 23      |

| Randomized Interventions<br>[0 = no or comparator, 1 = yes] |               |            |          |          |              | Number of Patients | Frequency of Risk Factors [percent] |         |            |         | Duration of Anesthesia [hours] | Risk according to Simplified Score [percent] | Maximum Nausea [average ratings] |      |         | Incidence of Nausea [percent of patients] |      |         | Average Number of Emesis |      |         | Incidence of Vomiting [percent of patients] |      |         | Incidence of PONV [percent of patients] |      |         |
|-------------------------------------------------------------|---------------|------------|----------|----------|--------------|--------------------|-------------------------------------|---------|------------|---------|--------------------------------|----------------------------------------------|----------------------------------|------|---------|-------------------------------------------|------|---------|--------------------------|------|---------|---------------------------------------------|------|---------|-----------------------------------------|------|---------|
| Ondansetron                                                 | Dexamethasone | Droperidol | Propofol | Nitrogen | Remifentanyl |                    | Females                             | History | Nonsmoking | Opioids |                                |                                              | Early                            | Late | Overall | Early                                     | Late | Overall | Early                    | Late | Overall | Early                                       | Late | Overall | Early                                   | Late | Overall |
| 1                                                           | 0             | 1          | 0        | 0        | 1            | 43                 | 74                                  | 51      | 72         | 83      | 1.76                           | 56                                           | 0.65                             | 1.65 | 1.95    | 12                                        | 33   | 35      | 0.05                     | 0.19 | 0.23    | 2                                           | 9    | 9       | 12                                      | 33   | 35      |
| 1                                                           | 0             | 1          | 0        | 1        | 0            | 43                 | 86                                  | 47      | 81         | 70      | 1.90                           | 57                                           | 0.09                             | 0.79 | 0.81    | 7                                         | 19   | 23      | 0.02                     | 0.02 | 0.05    | 2                                           | 2    | 5       | 9                                       | 19   | 26      |
| 1                                                           | 0             | 1          | 0        | 1        | 1            | 45                 | 80                                  | 60      | 78         | 87      | 1.78                           | 61                                           | 0.36                             | 0.93 | 1.16    | 7                                         | 22   | 24      | 0.04                     | 0.09 | 0.13    | 2                                           | 7    | 9       | 7                                       | 22   | 24      |
| 1                                                           | 0             | 1          | 1        | 0        | 0            | 83                 | 78                                  | 53      | 82         | 72      | 1.82                           | 58                                           | 0.36                             | 0.86 | 0.96    | 12                                        | 17   | 23      | 0.01                     | 0.12 | 0.13    | 1                                           | 10   | 10      | 12                                      | 18   | 23      |
| 1                                                           | 0             | 1          | 1        | 0        | 1            | 81                 | 79                                  | 54      | 81         | 89      | 2.02                           | 61                                           | 0.49                             | 1.51 | 1.69    | 10                                        | 32   | 37      | 0.06                     | 0.09 | 0.15    | 5                                           | 9    | 14      | 10                                      | 32   | 37      |
| 1                                                           | 0             | 1          | 1        | 1        | 0            | 84                 | 85                                  | 56      | 83         | 64      | 1.92                           | 57                                           | 0.45                             | 1.58 | 1.83    | 11                                        | 26   | 31      | 0.04                     | 0.17 | 0.20    | 4                                           | 13   | 14      | 12                                      | 30   | 33      |
| 1                                                           | 0             | 1          | 1        | 1        | 1            | 82                 | 80                                  | 57      | 76         | 90      | 1.86                           | 61                                           | 0.43                             | 1.15 | 1.35    | 10                                        | 16   | 22      | 0.01                     | 0.07 | 0.09    | 1                                           | 7    | 9       | 10                                      | 16   | 22      |
| 1                                                           | 1             | 0          | 0        | 0        | 0            | 43                 | 81                                  | 51      | 79         | 79      | 1.94                           | 58                                           | 1.28                             | 1.53 | 2.33    | 19                                        | 28   | 37      | 0.16                     | 0.28 | 0.44    | 12                                          | 14   | 21      | 21                                      | 30   | 37      |
| 1                                                           | 1             | 0          | 0        | 0        | 1            | 44                 | 73                                  | 39      | 80         | 89      | 1.76                           | 56                                           | 1.41                             | 0.73 | 1.68    | 25                                        | 25   | 34      | 0.14                     | 0.05 | 0.18    | 9                                           | 5    | 11      | 25                                      | 27   | 34      |
| 1                                                           | 1             | 0          | 0        | 1        | 0            | 38                 | 87                                  | 58      | 76         | 74      | 1.85                           | 59                                           | 1.11                             | 1.68 | 1.87    | 32                                        | 32   | 42      | 0.03                     | 0.13 | 0.16    | 3                                           | 11   | 13      | 32                                      | 32   | 42      |
| 1                                                           | 1             | 0          | 0        | 1        | 1            | 46                 | 74                                  | 67      | 72         | 93      | 1.86                           | 61                                           | 0.72                             | 1.37 | 1.85    | 17                                        | 28   | 35      | 0.07                     | 0.07 | 0.13    | 2                                           | 7    | 9       | 17                                      | 28   | 35      |
| 1                                                           | 1             | 0          | 1        | 0        | 0            | 85                 | 79                                  | 51      | 73         | 71      | 1.82                           | 54                                           | 0.34                             | 0.96 | 1.09    | 9                                         | 19   | 21      | 0.01                     | 0.15 | 0.16    | 1                                           | 8    | 9       | 9                                       | 19   | 21      |
| 1                                                           | 1             | 0          | 1        | 0        | 1            | 81                 | 79                                  | 51      | 83         | 88      | 1.63                           | 60                                           | 0.60                             | 1.01 | 1.35    | 11                                        | 16   | 21      | 0.04                     | 0.15 | 0.19    | 2                                           | 9    | 10      | 11                                      | 17   | 22      |
| 1                                                           | 1             | 0          | 1        | 1        | 0            | 85                 | 84                                  | 61      | 87         | 79      | 1.67                           | 62                                           | 0.08                             | 0.79 | 0.86    | 4                                         | 14   | 16      | 0.00                     | 0.07 | 0.07    | 0                                           | 7    | 7       | 4                                       | 15   | 18      |
| 1                                                           | 1             | 0          | 1        | 1        | 1            | 85                 | 86                                  | 56      | 79         | 91      | 1.82                           | 62                                           | 0.25                             | 0.78 | 0.91    | 7                                         | 16   | 22      | 0.00                     | 0.06 | 0.06    | 0                                           | 6    | 6       | 7                                       | 16   | 22      |
| 1                                                           | 1             | 1          | 0        | 0        | 0            | 44                 | 86                                  | 52      | 82         | 74      | 2.08                           | 59                                           | 0.61                             | 1.20 | 1.36    | 14                                        | 20   | 23      | 0.09                     | 0.09 | 0.18    | 5                                           | 9    | 11      | 14                                      | 20   | 23      |
| 1                                                           | 1             | 1          | 0        | 0        | 1            | 39                 | 85                                  | 62      | 79         | 76      | 1.56                           | 60                                           | 0.99                             | 1.28 | 2.01    | 15                                        | 26   | 33      | 0.00                     | 0.21 | 0.21    | 0                                           | 15   | 15      | 15                                      | 26   | 33      |
| 1                                                           | 1             | 1          | 0        | 1        | 0            | 44                 | 75                                  | 43      | 77         | 72      | 1.63                           | 53                                           | 0.25                             | 0.93 | 1.09    | 7                                         | 20   | 25      | 0.05                     | 0.05 | 0.09    | 5                                           | 5    | 9       | 7                                       | 20   | 25      |
| 1                                                           | 1             | 1          | 0        | 1        | 1            | 42                 | 83                                  | 55      | 79         | 88      | 2.06                           | 61                                           | 0.86                             | 1.07 | 1.52    | 19                                        | 26   | 29      | 0.05                     | 0.07 | 0.12    | 5                                           | 7    | 10      | 21                                      | 29   | 31      |
| 1                                                           | 1             | 1          | 1        | 0        | 0            | 82                 | 85                                  | 50      | 79         | 67      | 1.86                           | 56                                           | 0.53                             | 0.73 | 0.98    | 11                                        | 12   | 17      | 0.04                     | 0.07 | 0.11    | 4                                           | 4    | 6       | 11                                      | 12   | 17      |
| 1                                                           | 1             | 1          | 1        | 0        | 1            | 83                 | 81                                  | 57      | 76         | 89      | 1.89                           | 60                                           | 0.40                             | 0.67 | 0.89    | 10                                        | 14   | 18      | 0.00                     | 0.08 | 0.08    | 0                                           | 6    | 6       | 10                                      | 17   | 19      |
| 1                                                           | 1             | 1          | 1        | 1        | 0            | 90                 | 81                                  | 53      | 79         | 66      | 1.83                           | 56                                           | 0.19                             | 0.70 | 0.77    | 6                                         | 18   | 20      | 0.00                     | 0.03 | 0.03    | 0                                           | 2    | 2       | 6                                       | 18   | 20      |
| 1                                                           | 1             | 1          | 1        | 1        | 1            | 86                 | 84                                  | 57      | 88         | 80      | 1.85                           | 62                                           | 0.10                             | 0.60 | 0.69    | 8                                         | 12   | 17      | 0.00                     | 0.08 | 0.08    | 0                                           | 5    | 5       | 8                                       | 12   | 17      |

History = History of PONV or motion sickness, Opioids = postoperative use of opioids. Risk according to the simplified score reflects the probability of PONV based on the four most important risk factors.<sup>17</sup>

Maximum nausea intensities reflect the average values on a 0 to 10 rating scale. Early reflects the first 2 postoperative hours, late afterwards (>120 postoperative minutes) and overall the 0 to 24 hour interval.
